# Supplementary material for: Impact of substituent nature in diformylpyridyl Schiff base on photophysical and electrochemical properties of ruthenium- and iron-based complexes
Source: Royal Society of Chemistry journal article supplement (doi:10.1039/d2nj04050f), 2022-01-01
Supplement: d2nj04050f1.pdf [file d2nj04050f1.pdf]

## Supporting information

# The impact of substituent nature in diphormylpyridile Schiff base on photophysical and electrochemical properties of ruthenium and iron-based complexes

Ilya Pankov<sup>1</sup>, Anna Skidanenko<sup>1</sup> and Arshak Tsaturyan<sup>1,2\*</sup>

<sup>1</sup>Institute of Physical and Organic Chemistry, Southern Federal University, Stachki Av. 194/2 Rostov-on-Don, Russia

<sup>2</sup>Laboratoire Hubert Curien, Université Jean Monnet Saint-Etienne, Université de Lyon, CNRS, IOGS, Saint-Etienne, France

\* Corresponding author: [arshak.tsaturyan@univ-st-etienne.fr](mailto:arshak.tsaturyan@univ-st-etienne.fr)

### Content

|                                                                                                                                                                                                |     |
|------------------------------------------------------------------------------------------------------------------------------------------------------------------------------------------------|-----|
| Figure S1 Modeling electron absorption spectra for Ru(II)-based complex ...                                                                                                                    | S2  |
| Table S1 The calculated metal-ligand bond lengths, Å, for the optimized complexes (b3lyp/6-311g(d,p), Lanl2dz)                                                                                 | S3  |
| Table S2 Selected harmonic vibrational frequencies                                                                                                                                             | S4  |
| Figure S2. Molecular orbital composition (%) of the HOMO (a for Ru(II) and c for Fe(II) complexes) and LUMO (b for Ru(II) and d for Fe(II) complexes)                                          | S5  |
| Figure S3. Molecular orbital composition (%) of the HOMO (a for alpha and c for beta MO of Ru(III) complexes) and LUMO (b for alpha and d for beta MO of Ru(III) complexes)                    | S5  |
| Figure S4. Molecular orbital composition (%) of the HOMO (a for alpha and c for beta MO of Fe(III) complexes) and LUMO (b for alpha and d for beta MO of Fe(III) complexes)                    | S6  |
| Table S3. Calculated by TD-DFT electronic transitions and their assignment for ligand system.                                                                                                  | S7  |
| Table S4. Calculated by TD-DFT electronic transitions and their assignment for Ru(II) and Fe(II) complex.                                                                                      | S10 |
| Table S5. Calculated by TD-DFT electronic transitions and their assignment for Ru(III) and Fe(III) complex.                                                                                    | S13 |
| Table S6. Calculated redox potential and dipole moment of the ruthenium and iron-based complexes.                                                                                              | S16 |
| Table S7. Representation of natural transition orbitals (NTO) of the hole and electron (particle) pair for most intensive electron excitations of diphormylpyridile schiff base ligand systems | S16 |
| Table S8. Representation of natural transition orbitals (NTO) of the hole and electron (particle) pair for most intensive electron excitations of Ru(II) and Fe(II) complexes.                 | S18 |
| Table S9. Representation of natural transition orbitals (NTO) of the hole and electron (particle) pair for most intensive electron excitations of Ru(III) and Fe(III) complexes.               | S20 |

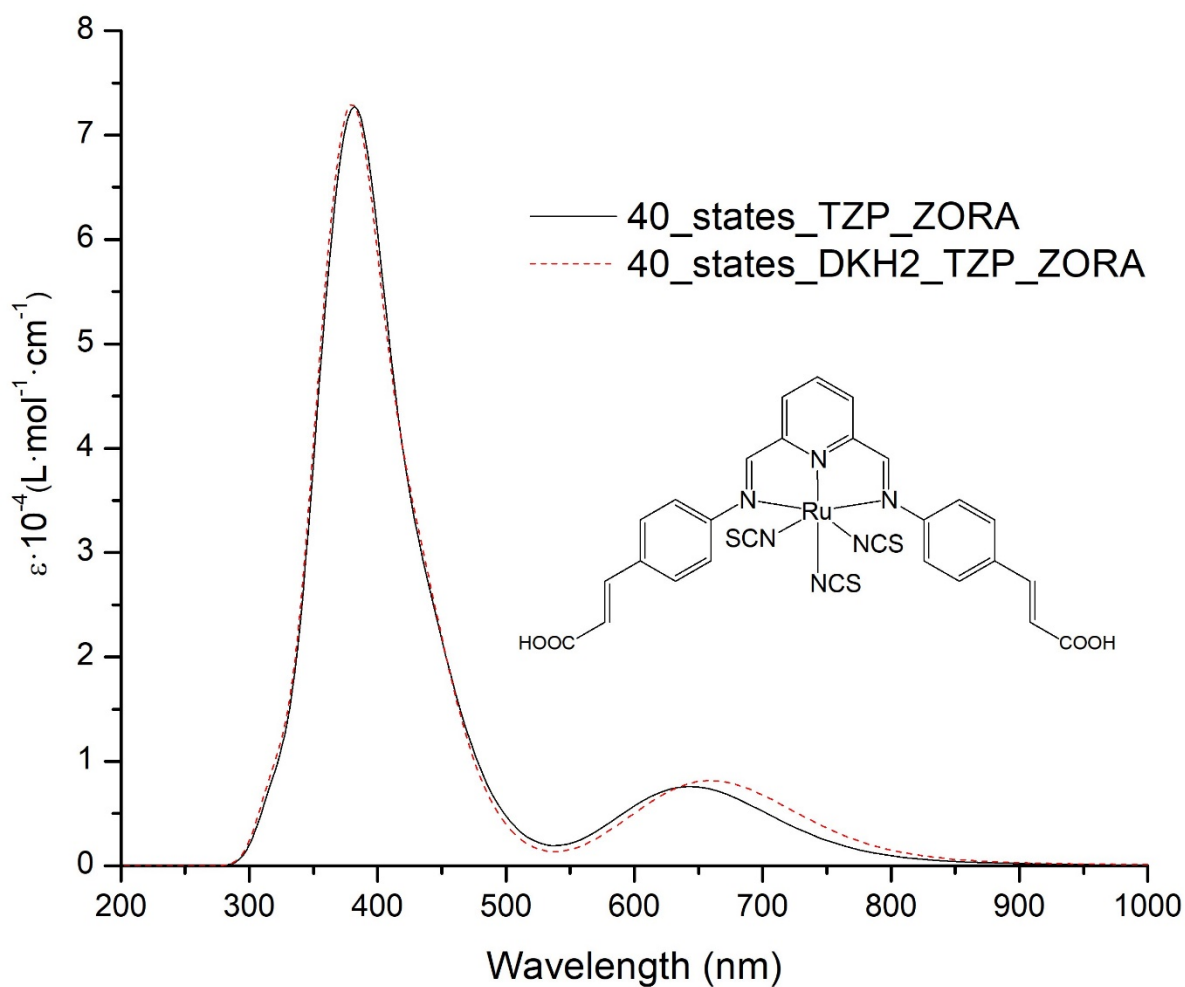

Figure S1 Modeling electron absorption spectra for Ru(II)-based complex at TD-B3LYP/6-311G(d,p) for non-metal atoms and **TZP-ZORA\*** for Ru atoms level of theory with using second-order Douglas-Kroll-Hess method.

\* TZP-ZORA, all-electron triple-zeta basis for calculations with the ZORA approach A. Canal Neto, I. B. Ferreira, F. E. Jorge, A. Z. de Oliveira, Chem. Phys. Lett. 771, 138548 (2021)  
[10.1016/j.cplett.2021.138548](https://doi.org/10.1016/j.cplett.2021.138548)

Table S1 The calculated metal-ligand bond lengths, Å, for the optimized complexes (B3LYP/6-311G(d,p), Lanl2DZ)

| Substituent-<br>R | M-N <sub>py</sub> | M-N <sub>hyd</sub> | M-<br>NCS <sub>axial</sub> | M-<br>NCS <sub>equatorial</sub> | M-N <sub>py</sub> | M-<br>N <sub>hyd</sub> | M-<br>NCS <sub>axial</sub> | M-<br>NCS <sub>equatorial</sub> |
|-------------------|-------------------|--------------------|----------------------------|---------------------------------|-------------------|------------------------|----------------------------|---------------------------------|
|                   | Fe(II)            |                    |                            |                                 | Fe(III)           |                        |                            |                                 |
| H                 | 1.89              | 2.06               | 1.97                       | 1.95                            | 1.90              | 2.05                   | 1.89                       | 1.93                            |
| CH <sub>3</sub>   | 1.89              | 2.06               | 1.97                       | 1.96                            | 1.91              | 2.08                   | 1.91                       | 1.89                            |
| COOH              | 1.88              | 2.06               | 1.97                       | 1.95                            | 1.91              | 2.08                   | 1.91                       | 1.88                            |
| NH <sub>2</sub>   | 1.90              | 2.07               | 1.97                       | 1.96                            | 1.91              | 2.08                   | 1.91                       | 1.89                            |
| NO <sub>2</sub>   | 1.87              | 2.06               | 1.96                       | 1.94                            | 1.91              | 2.08                   | 1.91                       | 1.89                            |
| OH                | 1.90              | 2.06               | 1.96                       | 1.97                            | 1.91              | 2.08                   | 1.91                       | 1.89                            |
|                   | Ru(II)            |                    |                            |                                 | Ru(III)           |                        |                            |                                 |
| H                 | 1.96              | 2.13               | 2.06                       | 2.08                            | 2.01              | 2.16                   | 2.02                       | 2.03                            |
| CH <sub>3</sub>   | 1.96              | 2.13               | 2.06                       | 2.08                            | 2.01              | 2.16                   | 2.02                       | 2.03                            |
| COOH              | 1.95              | 2.13               | 2.05                       | 2.08                            | 1.99              | 2.20<br>(2.12)         | 2.02                       | 2.03                            |
| NH <sub>2</sub>   | 1.97              | 2.13               | 2.06                       | 2.08                            | 2.01              | 2.16                   | 2.03                       | 2.03                            |
| NO <sub>2</sub>   | 1.94              | 2.13               | 2.05                       | 2.07                            | 1.99              | 2.21<br>(2.11)         | 2.02                       | 2.03                            |
| OH                | 1.97              | 2.13               | 2.06                       | 2.08                            | 2.01              | 2.16                   | 2.02                       | 2.03                            |

Table S2 Selected harmonic vibrational frequencies ( $\text{cm}^{-1}$ ) for diphenylpyridile Schiff bases and ruthenium and iron complexes predicted by the B3LYP functional.

| Type of vibration   | Ligand                                 | Ru(II) complexes                       | Ru(III) complexes                      | Fe(II) complexes                       | Fe(III) complexes                      |
|---------------------|----------------------------------------|----------------------------------------|----------------------------------------|----------------------------------------|----------------------------------------|
|                     | $\nu, \text{cm}^{-1}/\text{Intensity}$ |
| R=H                 |                                        |                                        |                                        |                                        |                                        |
| C=N <sub>py</sub>   | 1468/0.09                              | 1375/145.8                             | 1439/53.3                              | 1438/59                                | 1457/82                                |
|                     |                                        | 1407/63.7                              |                                        |                                        |                                        |
| C=N <sub>azom</sub> |                                        |                                        |                                        | 1654/66                                | 1656/18                                |
| R=CH <sub>3</sub>   |                                        |                                        |                                        |                                        |                                        |
| C=N <sub>azom</sub> | 1699/32.7                              | 1554/24.1                              | 1577/41.9                              | 1552/18                                | 1575/170                               |
| C=N <sub>py</sub>   | 1477/0.17                              | 1442/36                                | 1469/28.3                              | 1458/82                                | 1475/18                                |
| C=N <sub>azom</sub> | 1700/39                                | 1582/28.3                              | 1600/20.8                              | 1621/106                               | 1608/1                                 |
|                     | 1700.3/40                              |                                        |                                        |                                        |                                        |
| R=COOH              |                                        |                                        |                                        |                                        |                                        |
| C=N <sub>py</sub>   | 1469/10.3                              | 1387/625                               | 1403/235.3                             | 1398/394                               | 1410/126                               |
|                     |                                        | 1441/31.1                              | 1458/6.5                               |                                        |                                        |
| C=N <sub>azom</sub> | 1698/21.8                              | 1581/59.3                              | 1590/49.8                              | 1607/12                                | 1571/260                               |
|                     | 1699/18.4                              |                                        |                                        |                                        | 1661/4                                 |
| R=NH <sub>2</sub>   |                                        |                                        |                                        |                                        |                                        |
| C=N <sub>py</sub>   | 1485/10.6                              | 1408/0.4                               | 1416/9.8                               | 1476/192                               | 1502/139                               |
| C=N <sub>azom</sub> | 1702/65.8                              | 1585/57.7                              | 1587/2.3                               | 1559/9                                 | 1576/194                               |
|                     | 1703/46.3                              |                                        |                                        | 1608/27                                | 1612/4                                 |
| R=NO <sub>2</sub>   |                                        |                                        |                                        |                                        |                                        |
| C=N <sub>py</sub>   | 1460/0.1                               | 1378/17.8                              | 1438/8.9                               | 1429/20                                | 1447/28                                |
|                     |                                        | 1418/23.5                              |                                        |                                        |                                        |
| C=N <sub>azom</sub> | 1695/7.3                               | 1576/77                                | 1584/129.4                             | 1605/253                               | 1567/501                               |
| R=OH                |                                        |                                        |                                        |                                        |                                        |
| C=N <sub>py</sub>   | 1483/10.9                              | 1398/9.5                               | 1408/82.8                              | 1464/230                               | 1482/153                               |
|                     |                                        |                                        | 1479/274                               |                                        |                                        |
| C=N <sub>azom</sub> | 1701/33                                | 1581/20.6                              | 1592/14                                | 1560/23                                | 1579/261                               |
|                     | 1702/52.8                              |                                        | 1600/76.1                              | 1607/18                                | 1609/2                                 |

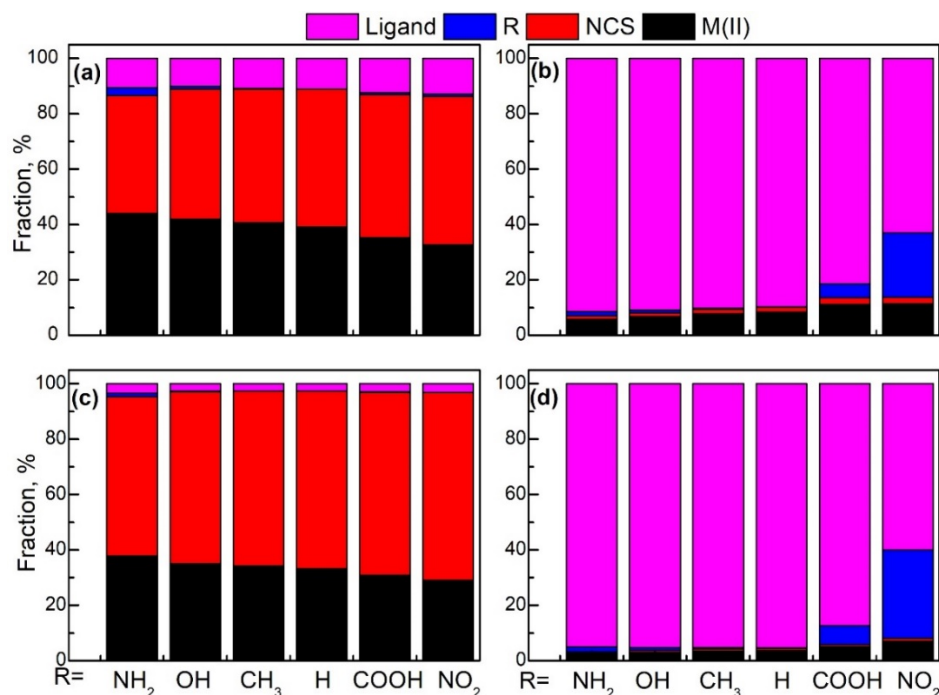

Figure S2. Molecular orbital composition (%) of the HOMO (a for Ru(II) and c for Fe(II) complexes) and LUMO (b for Ru(II) and d for Fe(II) complexes). MO of the calculated complexes is divided on four components: organic ligand, substituent R, NCS ligands and metal center.

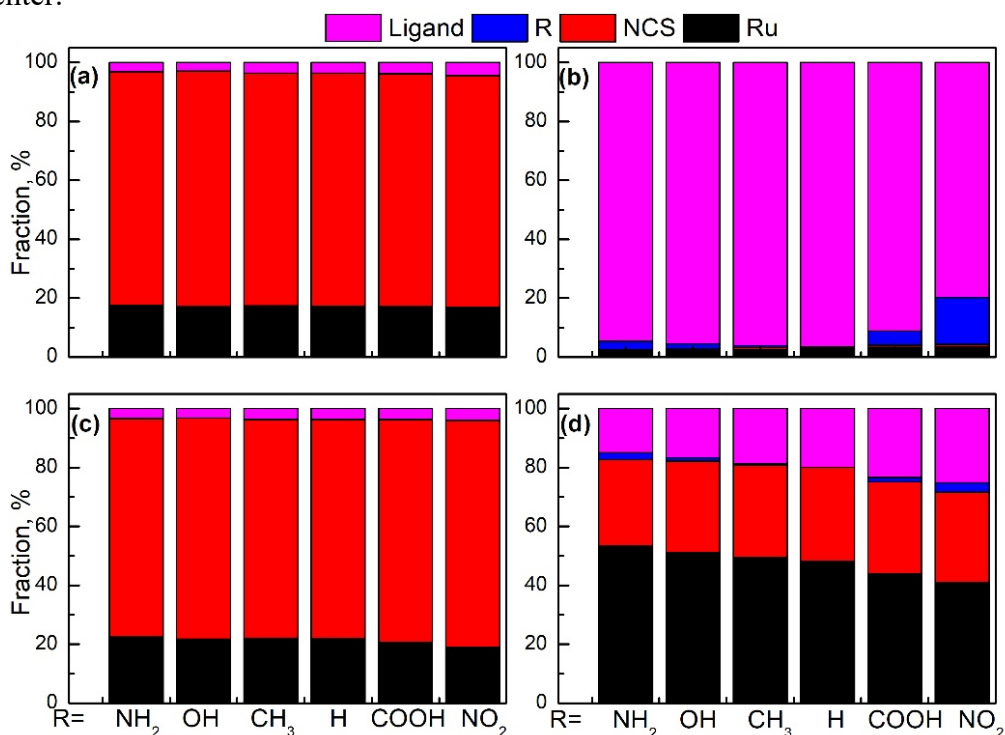

Figure S3. Molecular orbital composition (%) of the HOMO (a for alpha and c for beta MO of Ru(III) complexes) and LUMO (b for alpha and d for beta MO of Ru(III) complexes). MO of the calculated complexes is divided on four components: organic ligand, substituent R, NCS ligands and metal center.

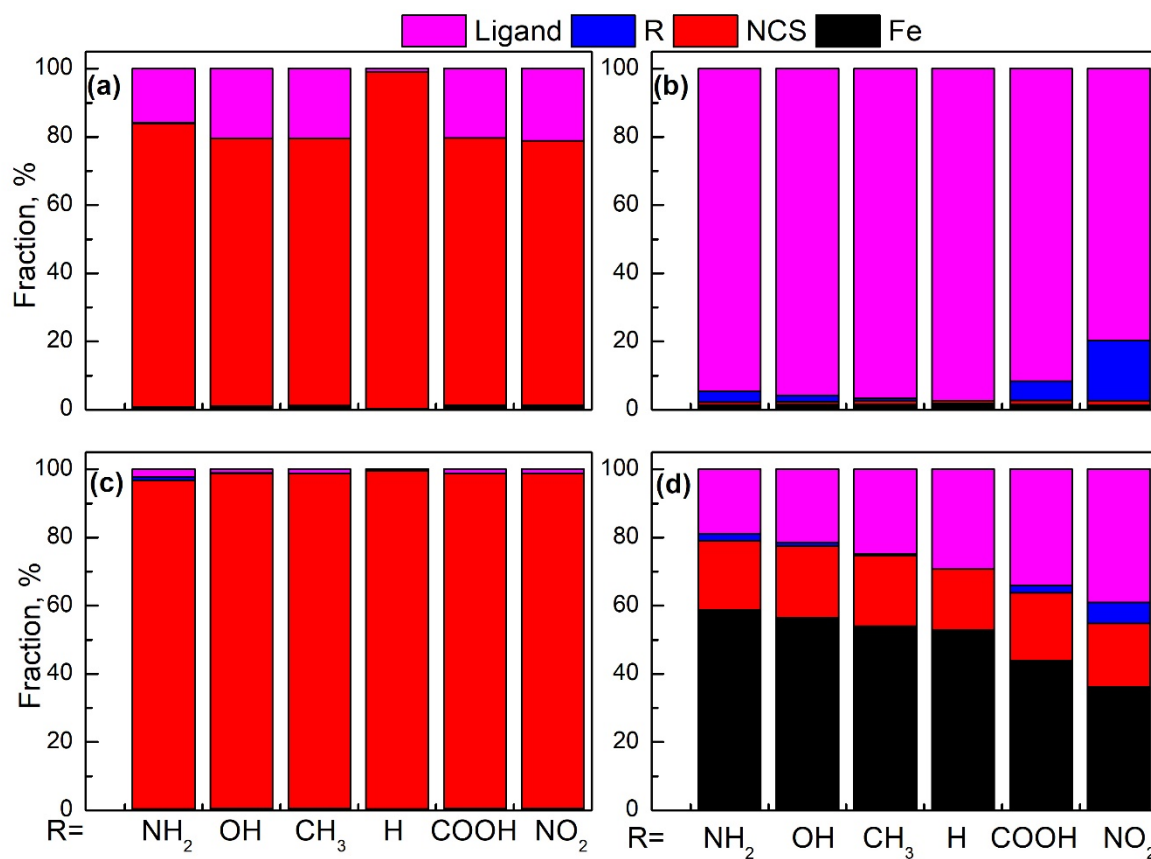

Figure S4. Molecular orbital composition (%) of the HOMO (a for alpha and c for beta MO of Fe(III) complexes) and LUMO (b for alpha and d for beta MO of Fe(III) complexes). MO of the calculated complexes is divided on four components: organic ligand, substituent R, NCS ligands and metal center.

Table. S3. Calculated by TD-DFT electronic transitions and their assignment for ligand system. Selected calculated optical transitions with oscillator strengths ( $f > 0.1$ ), wavelengths ( $\lambda$ , nm) and main orbital transition contributions ( $>10\%$ ) H – HOMO, L – LUMO. The selected calculated electron transitions,  $\Lambda$  parameters values and  $\Delta r$ -index for ligand system by using cam-b3lyp/6-311G(d,p) level of theory.

| No.               | $\lambda$ (nm) | f      | Major contribs                                                    | $\Lambda$ | $\Delta r$ -index, Å |
|-------------------|----------------|--------|-------------------------------------------------------------------|-----------|----------------------|
| R=NH <sub>2</sub> |                |        |                                                                   |           |                      |
| 1                 | 338            | 1.4399 | H-1->L+1 (32%), HOMO->LUMO (52%)                                  | 0.69743   | 0.54                 |
| 4                 | 278            | 0.8608 | H-7->L+1 (12%), H-1->L+2 (14%), HOMO->L+3 (15%)                   | 0.591482  | 1.16                 |
| 2                 | 327            | 0.4654 | H-1->LUMO (39%), HOMO->L+1 (40%)                                  | 0.726876  | 0.6                  |
| 19                | 215            | 0.3388 | H-5->LUMO (16%), H-4->L+1 (13%), H-1->L+4 (30%), HOMO->L+5 (33%)  | 0.564827  | 0.61                 |
| 33                | 189            | 0.3111 | H-5->LUMO (11%), H-5->L+5 (15%), H-4->L+1 (12%), H-4->L+4 (15%)   | 0.675798  | 0.67                 |
| 5                 | 276            | 0.2465 | H-7->LUMO (16%), H-1->L+3 (21%), HOMO->L+1 (12%), HOMO->L+2 (14%) | 0.654094  | 0.83                 |
| 24                | 202            | 0.1935 | H-7->L+2 (10%), H-5->L+3 (20%), H-4->L+2 (24%)                    | 0.522054  | 1.04                 |
| 34                | 189            | 0.1875 | H-8->L+1 (11%), H-5->L+1 (10%), H-5->L+4 (14%), H-4->L+5 (14%)    | 0.689088  | 0.59                 |
| 26                | 201            | 0.1467 | H-2->L+1 (18%), H-2->L+2 (47%)                                    | 0.469397  | 3.13                 |
| 37                | 180            | 0.1419 | H-16->LUMO (19%), H-15->L+1 (18%)                                 | 0.585724  | 0.83                 |
| 32                | 191            | 0.1252 | H-5->LUMO (26%), H-4->L+1 (35%)                                   | 0.544441  | 0.9                  |
| 12                | 247            | 0.1251 | H-3->L+1 (15%), H-1->LUMO (26%), HOMO->L+1 (24%), HOMO->L+2 (19%) | 0.708576  | 0.89                 |
| 16                | 235            | 0.1217 | H-1->LUMO (17%), H-1->L+3 (21%), HOMO->L+2 (11%)                  | 0.670865  | 0.9                  |
| 23                | 203            | 0.108  | H-2->LUMO (13%), H-2->L+3 (34%)                                   | 0.525865  | 2.53                 |
| 18                | 219            | 0.1077 | H-7->LUMO (15%), H-3->L+1 (43%)                                   | 0.654422  | 1.29                 |
| R=OH              |                |        |                                                                   |           |                      |
| 1                 | 342            | 1.3743 | H-1->L+1 (30%), HOMO->LUMO (50%)                                  | 0.674171  | 2.24                 |
| 3                 | 280            | 0.8023 | H-7->L+1 (13%), H-5->LUMO (10%)                                   | 0.567632  | 3.26                 |
| 2                 | 329            | 0.4339 | H-1->LUMO (38%), HOMO->L+1 (39%)                                  | 0.698177  | 1.86                 |
| 31                | 190            | 0.3121 | H-8->LUMO (11%), H-4->L+4 (12%)                                   | 0.610518  | 2.99                 |
| 19                | 215            | 0.2886 | H-1->L+4 (27%), HOMO->L+4 (13%), HOMO->L+5 (19%)                  | 0.520938  | 3.86                 |
| 4                 | 277            | 0.2799 | H-7->LUMO (16%), H-1->L+2 (12%), HOMO->L+1 (12%)                  | 0.581688  | 2.98                 |
| 24                | 203            | 0.2633 | H-3->L+3 (40%), H-2->L+3 (12%)                                    | 0.508547  | 2.81                 |
| 36                | 180            | 0.2148 | H-16->L+1 (12%)                                                   | 0.576113  | 2.49                 |
| 18                | 218            | 0.1775 | H-7->LUMO (10%), H-5->L+1 (38%)                                   | 0.62843   | 2.36                 |

|                   |     |        |                                                                                   |          |      |
|-------------------|-----|--------|-----------------------------------------------------------------------------------|----------|------|
| 32                | 190 | 0.1711 | H-8->L+1 (13%), H-3->L+5 (15%)                                                    | 0.61987  | 2.61 |
| 20                | 215 | 0.1545 | H-2->LUMO (11%), H-1->L+5 (24%), HOMO->L+4 (17%), HOMO->L+5 (15%)                 | 0.532392 | 3.63 |
| R=CH <sub>3</sub> |     |        |                                                                                   |          |      |
| 1                 | 344 | 1.4142 | H-1->L+1 (29%), HOMO->LUMO (56%)                                                  | 0.69152  | 0.77 |
| 3                 | 284 | 0.5301 | H-5->LUMO (34%), H-5->L+2 (12%), H-2->LUMO (15%)                                  | 0.586043 | 1.28 |
| 2                 | 330 | 0.4438 | H-1->LUMO (42%), HOMO->L+1 (38%)                                                  | 0.720545 | 0.87 |
| 24                | 203 | 0.3013 | H-4->L+2 (34%), H-3->L+3 (29%)                                                    | 0.497135 | 0.99 |
| 5                 | 278 | 0.2916 | H-6->LUMO (11%), H-1->L+2 (21%), HOMO->L+1 (15%), HOMO->L+3 (11%)                 | 0.668137 | 0.95 |
| 20                | 212 | 0.2648 | H-7->LUMO (16%), H-6->LUMO (33%), H-6->L+2 (10%), H-2->L+1 (18%)                  | 0.654735 | 1.35 |
| 19                | 215 | 0.218  | H-4->LUMO (16%), H-1->L+5 (25%), HOMO->L+4 (22%), HOMO->L+5 (10%)                 | 0.570282 | 1.13 |
| 6                 | 270 | 0.1932 | H-2->LUMO (10%), H-1->L+1 (22%), HOMO->L+2 (30%)                                  | 0.647044 | 0.9  |
| 31                | 190 | 0.1765 | H-8->LUMO (15%)                                                                   | 0.650694 | 0.94 |
| 27                | 196 | 0.1703 | H-11->L+1 (16%), H-8->LUMO (10%), H-4->LUMO (11%), H-3->L+1 (11%), H-2->L+2 (11%) | 0.636085 | 0.86 |
| 4                 | 278 | 0.1583 | H-8->LUMO (16%), H-5->LUMO (20%), H-5->L+2 (11%)                                  | 0.608709 | 1.03 |
| 30                | 193 | 0.156  | H-4->LUMO (17%), H-3->L+1 (30%), H-3->L+3 (12%), H-2->L+2 (10%)                   | 0.563413 | 1.05 |
| 32                | 190 | 0.1371 | H-8->L+1 (14%), H-4->L+5 (10%), H-3->L+4 (11%)                                    | 0.681295 | 0.95 |
| 39                | 179 | 0.1097 | H-4->L+5 (12%), H-3->L+4 (14%), H-2->L+3 (12%), H-1->L+6 (11%)                    | 0.70223  | 1.27 |
| R=H               |     |        |                                                                                   |          |      |
| 1                 | 346 | 1.3809 | H-1->L+1 (28%), HOMO->LUMO (57%)                                                  | 0.685938 | 0.8  |
| 2                 | 331 | 0.4177 | H-1->LUMO (42%), HOMO->L+1 (37%)                                                  | 0.705975 | 0.8  |
| 30                | 192 | 0.3521 | H-11->L+1 (13%), H-3->L+1 (16%), H-2->L+2 (11%)                                   | 0.628225 | 0.79 |
| 3                 | 287 | 0.3509 | H-5->LUMO (48%), H-5->L+2 (17%)                                                   | 0.576226 | 0.99 |
| 4                 | 280 | 0.3456 | H-7->LUMO (20%), H-6->L+1 (12%), H-2->LUMO (13%)                                  | 0.620126 | 0.55 |
| 5                 | 279 | 0.3058 | H-6->LUMO (19%), H-1->L+2 (22%), HOMO->L+1 (17%), HOMO->L+3 (11%)                 | 0.66086  | 0.52 |
| 23                | 204 | 0.3054 | H-4->L+2 (20%), H-3->L+3 (28%), H-2->L+2 (21%)                                    | 0.545428 | 0.72 |
| 17                | 216 | 0.2217 | H-10->L+1 (10%), H-2->LUMO (16%), H-1->L+5 (18%), HOMO->L+4 (21%)                 | 0.625922 | 0.5  |
| 6                 | 271 | 0.2015 | H-4->LUMO (12%), H-1->L+1 (25%), HOMO->L+2 (32%)                                  | 0.668871 | 0.61 |
| 31                | 191 | 0.169  | H-7->LUMO (14%), H-6->L+1 (14%)                                                   | 0.635843 | 0.52 |
| 27                | 196 | 0.1611 | H-11->L+1 (10%), H-4->LUMO (13%), H-3->L+1 (27%)                                  | 0.593818 | 0.71 |
| 32                | 190 | 0.1436 | H-7->L+1 (15%), H-3->L+4 (10%)                                                    | 0.678929 | 0.61 |



|                   |     |        |                                                                                   |          |      |
|-------------------|-----|--------|-----------------------------------------------------------------------------------|----------|------|
| 37                | 180 | 0.1087 | H-16->L+1 (24%), H-15->LUMO (26%)                                                 | 0.581159 | 0.87 |
| 19                | 214 | 0.1046 | H-10->L+1 (24%), H-4->LUMO (20%), H-1->L+5 (11%), HOMO->L+4 (10%)                 | 0.649095 | 0.7  |
| R=COOH            |     |        |                                                                                   |          |      |
| 1                 | 354 | 1.2295 | H-1->L+1 (23%), HOMO->LUMO (59%)                                                  | 0.62171  | 1.92 |
| 6                 | 279 | 0.7982 | H-7->LUMO (15%), H-1->L+1 (15%), H-1->L+3 (12%), HOMO->L+2 (30%)                  | 0.626817 | 0.95 |
| 34                | 193 | 0.5116 | H-12->L+1 (19%), H-10->L+3 (10%), H-4->L+2 (15%)                                  | 0.670373 | 1.95 |
| 2                 | 337 | 0.4063 | H-1->LUMO (42%), HOMO->L+1 (33%)                                                  | 0.626655 | 1.84 |
| 5                 | 282 | 0.3801 | H-5->LUMO (18%), H-1->L+2 (22%), HOMO->L+1 (25%)                                  | 0.640481 | 1.31 |
| 37                | 187 | 0.2707 | H-11->L+1 (13%), H-3->L+5 (17%), H-2->L+6 (11%)                                   | 0.611323 | 2.54 |
| 23                | 209 | 0.1973 | H-10->L+1 (16%), H-6->LUMO (16%)                                                  | 0.599246 | 1.32 |
| 3                 | 298 | 0.1959 | H-7->LUMO (39%), H-6->LUMO (30%), H-4->LUMO (10%)                                 | 0.585945 | 0.92 |
| 24                | 208 | 0.182  | H-10->L+1 (11%), H-3->L+2 (17%), H-2->L+1 (13%)                                   | 0.492541 | 2.2  |
| 25                | 207 | 0.1815 | H-3->L+1 (13%), H-2->L+2 (18%), H-1->L+6 (10%), HOMO->L+5 (11%)                   | 0.509591 | 2.12 |
| 28                | 200 | 0.1681 | H-6->L+2 (10%), H-3->LUMO (10%), H-2->L+1 (16%), H-2->L+3 (13%)                   | 0.493695 | 2.28 |
| 22                | 211 | 0.1492 | H-10->LUMO (12%), H-1->L+2 (24%), HOMO->L+3 (17%)                                 | 0.634589 | 1.43 |
| 26                | 204 | 0.1307 | H-12->LUMO (26%), H-6->L+1 (17%), H-5->L+2 (15%)                                  | 0.631788 | 0.73 |
| 38                | 186 | 0.1079 | H-3->L+6 (11%), H-2->L+5 (16%)                                                    | 0.67868  | 1.7  |
| R=NO <sub>2</sub> |     |        |                                                                                   |          |      |
| 1                 | 364 | 1.0423 | H-1->L+1 (19%), HOMO->LUMO (53%), HOMO->L+2 (11%)                                 | 0.507759 | 3.26 |
| 7                 | 284 | 0.863  | H-9->LUMO (14%), H-5->L+1 (10%), H-1->L+3 (10%), HOMO->L+2 (14%)                  | 0.551291 | 1.86 |
| 40                | 191 | 0.4319 | H-4->L+4 (12%), H-3->L+6 (14%), H-2->L+5 (15%)                                    | 0.664872 | 0.93 |
| 25                | 212 | 0.4029 | H-12->LUMO (10%), H-4->L+1 (14%), H-3->L+1 (16%), H-1->L+6 (10%), HOMO->L+5 (11%) | 0.567427 | 1.54 |
| 2                 | 343 | 0.3701 | H-1->LUMO (34%), H-1->L+2 (13%), HOMO->L+1 (30%)                                  | 0.540672 | 2.76 |
| 38                | 193 | 0.3253 | H-16->LUMO (44%)                                                                  | 0.601444 | 1.92 |
| 6                 | 289 | 0.3082 | H-1->LUMO (32%), H-1->L+2 (12%), HOMO->L+1 (37%)                                  | 0.565301 | 2.74 |
| 30                | 203 | 0.2411 | H-3->L+4 (14%), H-2->L+1 (10%), H-2->L+3 (30%)                                    | 0.458107 | 1.17 |
| 5                 | 301 | 0.2101 | H-9->LUMO (60%), H-6->LUMO (12%)                                                  | 0.480831 | 2.18 |
| 39                | 191 | 0.1808 | H-4->L+3 (10%), H-3->L+5 (12%), H-2->L+6 (11%)                                    | 0.653486 | 1.62 |
| 26                | 212 | 0.1806 | H-2->L+1 (27%), H-1->L+5 (18%), HOMO->L+6 (20%)                                   | 0.492273 | 1.42 |
| 23                | 223 | 0.1473 | H-12->LUMO (21%), H-10->LUMO (32%)                                                | 0.56439  | 2.72 |

|    |     |        |                                                                   |          |      |
|----|-----|--------|-------------------------------------------------------------------|----------|------|
| 8  | 277 | 0.1299 | H-6->L+1 (15%), H-5->LUMO (10%), H-1->LUMO (27%), HOMO->L+3 (10%) | 0.50291  | 2.53 |
| 24 | 216 | 0.1163 | H-6->LUMO (42%)                                                   | 0.486394 | 2.6  |

Table. S4. Calculated by TD-DFT electronic transitions and their assignment for Ru(II) and Fe(II) complex. Selected calculated optical transitions with oscillator strengths ( $f > 0.01$ ), wavelengths ( $\lambda$ , nm) and main orbital transition contributions ( $>10\%$ ) H – HOMO, L – LUMO. The selected calculated electron transitions,  $\Delta$  parameters values and  $\Delta r$ -index for Ru(II) and Fe(II) complexes by using cam-b3lyp/6-311G(d,p),Lanl2dz level of theory

| N o.              | $\lambda$ (nm) | f      | Major contribs                                   | $\Delta$ | $\Delta r$ -index, Å | No.            | $\lambda$ (nm) | f      | Major contribs                                                   | $\Delta$ | $\Delta r$ -index, Å |
|-------------------|----------------|--------|--------------------------------------------------|----------|----------------------|----------------|----------------|--------|------------------------------------------------------------------|----------|----------------------|
| Ru(II)-complex    |                |        |                                                  |          |                      | Fe(II)-complex |                |        |                                                                  |          |                      |
| R=NH <sub>2</sub> |                |        |                                                  |          |                      |                |                |        |                                                                  |          |                      |
| 10                | 340            | 0.9769 | H-7->L+1 (13%), H-6->LUMO (65%)                  | 0.56526  | 1.44                 | 13             | 332            | 0.9194 | H-7->L+1 (16%), H-6->LUMO (56%)                                  | 0.5551   | 1.57                 |
| 11                | 326            | 0.4874 | H-7->LUMO (14%), H-6->L+1 (24%), H-4->LUMO (44%) | 0.45022  | 1.45                 | 14             | 322            | 0.5006 | H-7->LUMO (14%), H-6->L+1 (26%), H-4->LUMO (39%)                 | 0.4463   | 1.25                 |
| 15                | 312            | 0.2907 | H-7->LUMO (37%), H-6->L+1 (15%), H-4->LUMO (38%) | 0.46949  | 1.48                 | 18             | 305            | 0.3753 | H-7->LUMO (30%), H-6->L+1 (19%), H-4->LUMO (38%)                 | 0.4743   | 1.22                 |
| 36                | 253            | 0.229  | H-7->L+3 (25%), H-6->L+2 (25%), H-2->L+3 (13%)   | 0.48842  | 0.94                 | 21             | 292            | 0.1566 | H-9->LUMO (15%), H-7->L+1 (22%), H-3->L+1 (32%)                  | 0.3373   | 1.72                 |
| 19                | 294            | 0.1337 | H-7->L+1 (20%), H-4->L+1 (44%)                   | 0.34608  | 1.61                 | 30             | 260            | 0.1155 | H-9->LUMO (10%), H-7->L+3 (11%), H-6->L+2 (19%), HOMO->L+3 (19%) | 0.4413   | 1.13                 |
|                   |                |        |                                                  |          |                      | 15             | 313            | 0.1108 | H-4->LUMO (10%), H-3->LUMO (73%)                                 | 0.1898   | 2.01                 |
|                   |                |        |                                                  |          |                      | 26             | 271            | 0.1074 | H-10->L+1 (26%), H-2->L+1 (17%), H-2->L+3 (12%)                  | 0.3175   | 2.03                 |
| R=OH              |                |        |                                                  |          |                      |                |                |        |                                                                  |          |                      |
| 9                 | 345            | 0.9224 | H-7->L+1 (13%), H-6->LUMO (62%)                  | 0.55269  | 1.76                 | 13             | 337            | 0.8677 | H-7->L+1 (15%), H-6->LUMO (53%)                                  | 0.5307   | 2.29                 |
| 14                | 318            | 0.4038 | H-7->LUMO (44%), H-6->L+1 (20%), H-4->LUMO (23%) | 0.49216  | 1.93                 | 17             | 312            | 0.4809 | H-7->LUMO (35%), H-6->L+1 (23%), H-4->LUMO (23%)                 | 0.4815   | 2.11                 |
| 11                | 331            | 0.3325 | H-6->L+1 (18%), H-4->LUMO (51%), H-3->LUMO (12%) | 0.39461  | 1.71                 | 14             | 328            | 0.3626 | H-6->L+1 (19%), H-4->LUMO (46%), H-3->LUMO (10%)                 | 0.3721   | 1.84                 |
| 36                | 254            | 0.2581 | H-7->L+3 (26%), H-6->L+2 (21%)                   | 0.51626  | 2.26                 | 21             | 296            | 0.2416 | H-9->LUMO (37%), H-7->L+1 (25%), H-1->LUMO (11%)                 | 0.4230   | 1.94                 |

|                   |     |        |                                                                                   |              |      |    |     |        |                                                                     |              |      |
|-------------------|-----|--------|-----------------------------------------------------------------------------------|--------------|------|----|-----|--------|---------------------------------------------------------------------|--------------|------|
| 19                | 299 | 0.1667 | H-9->LUMO (18%), H-7->L+1 (24%), H-4->L+1 (30%)                                   | 0.35943<br>1 | 1.74 | 29 | 262 | 0.1543 | H-9->LUMO (10%), H-7->L+3 (12%), H-6->L+2 (19%)                     | 0.4844<br>3  | 2.53 |
| 25                | 280 | 0.1123 | H-10->L+1 (14%), H-8->L+1 (11%), H-2->L+1 (10%), H-2->L+3 (18%)                   | 0.35205<br>1 | 2.21 | 31 | 256 | 0.1158 | H-7->L+3 (12%), HOMO->L+2 (20%)                                     | 0.4109<br>64 | 2.77 |
| 16                | 308 | 0.1024 | H-9->LUMO (14%), H-4->L+1 (16%), H-3->L+1 (44%)                                   | 0.24964<br>3 | 2.44 | 26 | 274 | 0.1034 | H-10->L+1 (27%), H-2->L+1 (17%)                                     | 0.2995<br>5  | 2.61 |
| R=CH <sub>3</sub> |     |        |                                                                                   |              |      |    |     |        |                                                                     |              |      |
| 9                 | 347 | 0.9042 | H-7->L+1 (11%), H-6->LUMO (69%)                                                   | 0.56449<br>4 | 1.54 | 13 | 340 | 0.7896 | H-7->L+1 (11%), H-6->LUMO (60%)                                     | 0.5364<br>89 | 1.84 |
| 14                | 319 | 0.4926 | H-7->LUMO (52%), H-6->L+1 (21%), H-4->LUMO (13%)                                  | 0.51676<br>7 | 1.94 | 17 | 313 | 0.5933 | H-7->LUMO (43%), H-6->L+1 (27%), H-4->LUMO (13%)                    | 0.5255<br>65 | 1.96 |
| 16                | 305 | 0.2727 | H-9->LUMO (36%), H-7->L+1 (10%), H-4->L+1 (19%)                                   | 0.40205<br>2 | 1.46 | 14 | 330 | 0.2634 | H-6->L+1 (13%), H-4->LUMO (58%), H-3->LUMO (12%)                    | 0.3394<br>99 | 1.28 |
| 11                | 333 | 0.2533 | H-6->L+1 (13%), H-4->LUMO (58%), H-3->LUMO (15%)                                  | 0.36825<br>1 | 1.64 | 21 | 296 | 0.25   | H-8->LUMO (26%), H-7->L+1 (26%), H-4->L+1 (26%)                     | 0.3981<br>38 | 1.24 |
| 36                | 253 | 0.2244 | H-7->L+3 (24%), H-6->L+2 (22%), H-2->L+3 (11%)                                    | 0.49718<br>7 | 1    | 29 | 263 | 0.1545 | H-7->L+3 (13%), H-6->L+2 (20%), HOMO->L+3 (11%)                     | 0.4485<br>58 | 1.05 |
| 18                | 298 | 0.105  | H-8->LUMO (27%), H-7->LUMO (12%), H-6->L+1 (11%), H-2->LUMO (17%), H-2->L+2 (11%) | 0.44583<br>7 | 1.83 | 26 | 271 | 0.1238 | H-12->LUMO (22%), H-11->L+1 (20%), H-9->L+1 (11%)                   | 0.3652<br>29 | 1.6  |
|                   |     |        |                                                                                   |              |      | 32 | 255 | 0.1164 | H-7->L+1 (11%), H-7->L+3 (14%), H-6->L+2 (10%), H-1->L+2 (19%)      | 0.4103<br>84 | 1.42 |
| R=H               |     |        |                                                                                   |              |      |    |     |        |                                                                     |              |      |
| 9                 | 350 | 0.8665 | H-7->L+1 (10%), H-6->LUMO (70%)                                                   | 0.55930<br>9 | 1.63 | 13 | 343 | 0.7328 | H-7->L+1 (10%), H-6->LUMO (60%)                                     | 0.5249<br>19 | 1.96 |
| 14                | 321 | 0.5123 | H-7->LUMO (57%), H-6->L+1 (22%)                                                   | 0.52964<br>9 | 2.07 | 17 | 316 | 0.6058 | H-7->LUMO (48%), H-6->L+1 (28%)                                     | 0.5370<br>67 | 2.16 |
| 16                | 307 | 0.296  | H-8->LUMO (40%), H-7->L+1 (11%), H-4->L+1 (18%)                                   | 0.41583<br>2 | 1.43 | 21 | 298 | 0.2309 | H-8->LUMO (23%), H-7->L+1 (24%), H-4->L+1 (34%)                     | 0.3861<br>15 | 1.23 |
| 36                | 253 | 0.2173 | H-10->L+1 (11%), H-7->L+3 (22%), H-6->L+2 (20%), H-2->L+3 (10%)                   | 0.48631<br>9 | 1.03 | 14 | 335 | 0.1826 | H-4->LUMO (63%), H-3->LUMO (13%)                                    | 0.3102<br>3  | 1.34 |
| 10                | 336 | 0.1681 | H-4->LUMO (62%), H-3->LUMO (18%)                                                  | 0.34117<br>9 | 1.75 | 29 | 264 | 0.156  | H-9->L+1 (10%), H-7->L+3 (13%), H-6->L+2 (18%), HOMO->L+3 (13%)     | 0.4142<br>32 | 1.13 |
| 23                | 281 | 0.1182 | H-6->L+1 (19%), H-1->L+3 (13%), H-1->L+12 (12%), HOMO->L+2 (10%)                  | 0.46264<br>7 | 1.33 | 26 | 271 | 0.1378 | H-12->LUMO (28%), H-11->L+1 (24%)                                   | 0.3929<br>62 | 1.65 |
|                   |     |        |                                                                                   |              |      | 32 | 256 | 0.1283 | H-10->L+1 (10%), H-7->L+1 (11%), H-7->L+3 (14%), H-6->L+2 (11%), H- | 0.4146<br>67 | 1.47 |

|                   |     |        |                                                                 |              |      |    |     |        |  |                                                                    |              |      |
|-------------------|-----|--------|-----------------------------------------------------------------|--------------|------|----|-----|--------|--|--------------------------------------------------------------------|--------------|------|
|                   |     |        |                                                                 |              |      |    |     |        |  | 1->L+2 (18%)                                                       |              |      |
|                   |     |        |                                                                 |              |      | 18 | 307 | 0.1224 |  | H-8->LUMO (21%), H-4->L+1 (31%),<br>H-3->L+1 (21%)                 | 0.2908<br>66 | 1.45 |
| R=COOH            |     |        |                                                                 |              |      |    |     |        |  |                                                                    |              |      |
| 9                 | 359 | 0.5781 | H-6->LUMO (49%), H-2->L+7 (12%)                                 | 0.48771<br>1 | 2.13 | 17 | 327 | 0.6173 |  | H-7->LUMO (57%), H-6->L+1 (24%)                                    | 0.4947<br>55 | 3.15 |
| 13                | 331 | 0.537  | H-7->LUMO (69%), H-6->L+1 (18%)                                 | 0.49995<br>9 | 2.79 | 18 | 319 | 0.2751 |  | H-8->LUMO (33%), H-4->L+1 (27%)                                    | 0.3420<br>52 | 1.81 |
| 15                | 316 | 0.3819 | H-8->LUMO (45%), H-7->L+1 (14%), H-4->L+1 (15%)                 | 0.42758<br>3 | 1.81 | 34 | 257 | 0.2646 |  | H-10->L+1 (11%), H-7->L+3 (21%),<br>H-6->L+2 (13%)                 | 0.4817<br>8  | 1.54 |
| 16                | 309 | 0.2356 | H-9->LUMO (42%), H-6->L+1 (17%), H-2->LUMO (16%)                | 0.44984<br>5 | 2.74 | 13 | 355 | 0.2531 |  | H-10->L+12 (11%), H-6->LUMO (29%)                                  | 0.4171<br>66 | 2.56 |
| 24                | 286 | 0.2315 | H-9->LUMO (18%), H-7->LUMO (16%), H-6->L+1 (40%)                | 0.55932      | 2.29 | 11 | 359 | 0.1962 |  | H-10->L+12 (12%), H-6->LUMO (24%), H-1->LUMO (11%)                 | 0.3906<br>66 | 2.41 |
| 35                | 256 | 0.2048 | H-7->L+3 (17%), H-6->L+2 (10%), H-1->L+4 (17%), HOMO->L+3 (11%) | 0.41894<br>1 | 1.19 | 25 | 284 | 0.1761 |  | H-8->L+1 (15%), H-7->LUMO (21%),<br>H-6->L+1 (33%)                 | 0.5190<br>09 | 2.39 |
| 18                | 304 | 0.2043 | HOMO->L+2 (75%), HOMO->L+4 (10%)                                | 0.30518      | 0.6  | 10 | 366 | 0.1413 |  | H-10->L+1 (11%), H-6->LUMO (10%), H-2->L+1 (50%)                   | 0.2468<br>52 | 3.1  |
|                   |     |        |                                                                 |              |      | 31 | 267 | 0.1358 |  | H-10->L+1 (10%), H-9->L+1 (10%),<br>H-1->L+2 (27%)                 | 0.2819<br>13 | 1.46 |
|                   |     |        |                                                                 |              |      | 22 | 301 | 0.1356 |  | H-10->LUMO (34%), H-9->LUMO (10%), H-6->L+1 (14%), H-2->LUMO (25%) | 0.3524<br>28 | 3.18 |
|                   |     |        |                                                                 |              |      | 27 | 275 | 0.1344 |  | H-12->LUMO (32%), H-11->L+1 (28%)                                  | 0.3527<br>97 | 2.22 |
|                   |     |        |                                                                 |              |      | 20 | 307 | 0.1239 |  | H-8->LUMO (12%), H-7->L+1 (13%),<br>H-5->L+1 (13%), H-4->L+1 (49%) | 0.2895<br>33 | 1.34 |
| R=NO <sub>2</sub> |     |        |                                                                 |              |      |    |     |        |  |                                                                    |              |      |
| 8                 | 374 | 0.3498 | H-6->LUMO (60%)                                                 | 0.43920<br>2 | 3.4  | 17 | 339 | 0.4568 |  | H-7->LUMO (55%), H-6->L+1 (17%)                                    | 0.4009<br>98 | 4.21 |
| 16                | 326 | 0.3469 | H-8->LUMO (37%), H-7->L+1 (14%), H-4->L+1 (15%)                 | 0.39752<br>4 | 2.51 | 39 | 261 | 0.3526 |  | H-7->L+3 (22%), H-6->L+4 (14%)                                     | 0.4997<br>98 | 1.78 |
| 26                | 296 | 0.3429 | H-9->LUMO (18%), H-7->LUMO (16%), H-6->L+1 (44%)                | 0.51161<br>4 | 3.2  | 18 | 331 | 0.3062 |  | H-8->LUMO (28%), H-4->L+1 (26%)                                    | 0.3194<br>44 | 2.53 |
| 13                | 351 | 0.3342 | HOMO->L+2 (75%)                                                 | 0.32007<br>9 | 2.66 | 27 | 296 | 0.2839 |  | H-7->LUMO (26%), H-6->L+1 (36%)                                    | 0.4576<br>69 | 3.49 |
| 19                | 318 | 0.2579 | H-9->LUMO (45%), H-6->L+1 (20%), H-                             | 0.43355      | 3.85 | 12 | 376 | 0.2069 |  | H-6->LUMO (21%), H-2->L+1 (28%)                                    | 0.2847       | 3.42 |

|    |     |        |                                                                    |              |      |    |     |        |                                                    |              |      |  |
|----|-----|--------|--------------------------------------------------------------------|--------------|------|----|-----|--------|----------------------------------------------------|--------------|------|--|
|    |     |        | 2->LUMO (16%)                                                      | 7            |      |    |     |        |                                                    |              | 93   |  |
| 12 | 361 | 0.1646 | H-9->L+7 (17%), H-2->L+7 (35%)                                     | 0.41355<br>5 | 1.87 | 14 | 372 | 0.1543 | H-6->LUMO (30%), H-2->L+1 (31%)                    | 0.2929<br>04 | 3.83 |  |
| 27 | 296 | 0.1243 | H-8->LUMO (13%), H-7->L+1 (40%), H-6->LUMO (12%)                   | 0.46978<br>9 | 2.71 | 26 | 302 | 0.1497 | H-9->LUMO (45%), HOMO->L+2 (26%)                   | 0.3325<br>37 | 3.05 |  |
| 28 | 282 | 0.1188 | H-12->LUMO (34%), H-12->L+2 (12%), H-11->L+1 (22%), H-9->L+1 (10%) | 0.30409<br>1 | 2.99 | 35 | 272 | 0.134  | H-10->L+1 (14%), H-9->L+1 (34%)                    | 0.3221<br>29 | 1.98 |  |
| 34 | 272 | 0.1144 | H-10->L+1 (27%), HOMO->L+3 (19%)                                   | 0.39284<br>6 | 1.57 | 31 | 279 | 0.1239 | H-12->LUMO (30%), H-12->L+2 (13%), H-11->L+1 (31%) | 0.3240<br>4  | 3.1  |  |

Table. S5. Calculated by TD-DFT electronic transitions and their assignment for Ru(III) and Fe(III) complexes. Selected calculated optical transitions with oscillator strengths ( $f > 0.1$ ), wavelengths ( $\lambda$ , nm) and main orbital transition contributions ( $>10\%$ ) H – HOMO, L – LUMO. The selected calculated electron transitions,  $\Lambda$  parameters values and  $\Delta r$ -index for for Ru(III) and Fe(III) complexes by using cam-b3lyp/6-311G(d,p),Lanl2dz level of theory.

| No.               | $\lambda$ (nm) | f          | Major contribs                                                                          | $\Lambda$    | $\Delta r$ -index, Å | No.             | $\lambda$ (nm) | f          | Major contribs                                                      | $\Lambda$    | $\Delta r$ -index, Å |
|-------------------|----------------|------------|-----------------------------------------------------------------------------------------|--------------|----------------------|-----------------|----------------|------------|---------------------------------------------------------------------|--------------|----------------------|
| Ru(III) complex   |                |            |                                                                                         |              |                      | Fe(III) complex |                |            |                                                                     |              |                      |
| R=NH <sub>2</sub> |                |            |                                                                                         |              |                      |                 |                |            |                                                                     |              |                      |
| 29                | 350            | 0.430<br>5 | H-4(A)->LUMO(A) (15%), H-5(B)->L+1(B) (12%), H-1(B)->L+2(B) (30%)                       | 0.3853<br>2  | 2.69                 | 28              | 338            | 0.779<br>5 | H-4(A)->LUMO(A) (16%), H-5(B)->L+1(B) (21%)                         | 0.44<br>6923 | 2.61                 |
| 40                | 324            | 0.337<br>6 | H-2(B)->L+1(B) (62%)                                                                    | 0.3137<br>23 | 2.57                 | 32              | 328            | 0.199<br>6 | H-4(B)->L+2(B) (10%), H-3(B)->L+2(B) (10%), HOMO(B)->L+1(B) (11%)   | 0.36<br>2869 | 2.5                  |
| 33                | 340            | 0.330<br>1 | H-1(A)->L+1(A) (11%), H-5(B)->L+1(B) (19%), H-1(B)->L+2(B) (25%)                        | 0.3594<br>15 | 2.78                 | 34              | 324            | 0.148<br>7 | HOMO(B)->L+1(B) (16%), HOMO(B)->L+2(B) (11%)                        | 0.29<br>6941 | 2.49                 |
| 5                 | 584            | 0.247<br>8 | H-3(B)->LUMO(B) (95%)                                                                   | 0.4367<br>68 | 0.42                 | 33              | 326            | 0.107<br>9 | HOMO(A)->L+1(A) (13%), HOMO(A)->L+2(A) (23%)                        | 0.30<br>2544 | 2.35                 |
| 37                | 328            | 0.207<br>8 | H-3(A)->LUMO(A) (32%), H-5(B)->L+2(B) (14%)                                             | 0.5120<br>25 | 2.23                 | 12              | 504            | 0.101<br>8 | H-6(B)->LUMO(B) (12%), H-3(B)->LUMO(B) (56%), H-1(B)->LUMO(B) (19%) | 0.40<br>2851 | 1.06                 |
| R=OH              |                |            |                                                                                         |              |                      | 27              | 342            | 0.101<br>6 | H-1(A)->LUMO(A) (13%), H-8(B)->LUMO(B) (31%)                        | 0.45<br>2464 | 2.23                 |
| 28                | 359            | 0.430<br>2 | H-4(A)->LUMO(A) (15%), H-5(B)->L+1(B) (13%), H-4(B)->L+2(B) (11%), H-1(B)->L+2(B) (33%) | 0.3821<br>62 | 3.25                 | R=OH            |                |            |                                                                     |              |                      |

|                   |     |            |                                                                                         |              |      |    |     |            |                                                                     |              |      |
|-------------------|-----|------------|-----------------------------------------------------------------------------------------|--------------|------|----|-----|------------|---------------------------------------------------------------------|--------------|------|
| 30                | 350 | 0.272<br>7 | H-1(A)->L+1(A) (12%), H-5(B)->L+1(B) (14%), H-1(B)->L+2(B) (18%)                        | 0.3423<br>45 | 3.04 | 27 | 348 | 0.425<br>8 | H-4(A)->LUMO(A) (24%), H-5(B)->L+1(B) (13%), H-2(B)->L+1(B) (10%)   | 0.37<br>4633 | 2.68 |
| 5                 | 618 | 0.243<br>1 | H-3(B)->LUMO(B) (87%)                                                                   | 0.4466<br>06 | 0.54 | 26 | 349 | 0.167<br>5 | H-2(A)->LUMO(A) (52%), H-1(A)->LUMO(A) (17%)                        | 0.27<br>1537 | 2.06 |
| 39                | 332 | 0.162<br>4 | H-4(A)->L+1(A) (11%), H-4(B)->L+1(B) (27%)                                              | 0.4624<br>7  | 2.98 | 29 | 344 | 0.130<br>9 | H-2(B)->L+1(B) (36%)                                                | 0.30<br>7376 | 2.45 |
| 37                | 335 | 0.132<br>4 | H-3(A)->LUMO(A) (19%), H-2(B)->L+1(B) (43%)                                             | 0.3680<br>49 | 3.04 | 12 | 525 | 0.126<br>9 | H-3(B)->LUMO(B) (59%), H-1(B)->LUMO(B) (21%)                        | 0.41<br>0237 | 1.22 |
| R=CH <sub>3</sub> |     |            |                                                                                         |              |      |    |     |            |                                                                     |              |      |
| 27                | 359 | 0.674<br>7 | H-3(A)->LUMO(A) (21%), H-4(B)->L+1(B) (24%), H-1(B)->L+2(B) (13%)                       | 0.4510<br>21 | 3.36 | 27 | 352 | 0.484<br>4 | H-4(A)->LUMO(A) (19%), H-4(B)->L+1(B) (11%), H-2(B)->L+1(B) (18%)   | 0.38<br>1268 | 2.7  |
| 36                | 338 | 0.348<br>5 | H-4(A)->LUMO(A) (40%), H-5(B)->L+1(B) (11%), H-4(B)->L+2(B) (12%)                       | 0.4623<br>34 | 3.14 | 29 | 347 | 0.157<br>9 | H-5(A)->LUMO(A) (16%), H-2(B)->L+1(B) (11%)                         | 0.34<br>7293 | 2.4  |
| 5                 | 631 | 0.261<br>9 | H-3(B)->LUMO(B) (94%)                                                                   | 0.4592<br>32 | 0.45 | 12 | 530 | 0.135<br>2 | H-6(B)->LUMO(B) (10%), H-3(B)->LUMO(B) (60%), H-1(B)->LUMO(B) (18%) | 0.42<br>0755 | 1.28 |
| 39                | 328 | 0.119<br>9 | H-6(A)->LUMO(A) (21%), H-5(B)->L+1(B) (17%)                                             | 0.3960<br>26 | 2.47 |    |     |            |                                                                     |              |      |
| R=H               |     |            |                                                                                         |              |      |    |     |            |                                                                     |              |      |
| 27                | 363 | 0.671<br>2 | H-3(A)->LUMO(A) (23%), H-5(B)->L+2(B) (10%), H-4(B)->L+1(B) (31%), H-1(B)->L+2(B) (10%) | 0.4619<br>93 | 2.5  | 27 | 356 | 0.323<br>8 | H-2(A)->LUMO(A) (11%), H-5(B)->L+1(B) (18%), H-2(B)->L+1(B) (24%)   | 0.36<br>2037 | 2.45 |
| 4                 | 646 | 0.272<br>8 | H-3(B)->LUMO(B) (96%)                                                                   | 0.4673<br>23 | 0.39 | 10 | 546 | 0.153      | H-3(B)->LUMO(B) (45%), H-1(B)->LUMO(B) (18%)                        | 0.39<br>7595 | 1.87 |
| 34                | 342 | 0.167<br>4 | H-4(A)->LUMO(A) (29%), HOMO(A)->L+1(A) (12%), H-2(B)->L+1(B) (23%)                      | 0.3866<br>35 | 2.47 | 28 | 354 | 0.129<br>5 | H-3(A)->LUMO(A) (12%), H-2(B)->L+1(B) (18%), HOMO(B)->L+1(B) (10%)  | 0.33<br>7078 | 2.78 |
| 38                | 331 | 0.143<br>4 | H-6(A)->LUMO(A) (71%)                                                                   | 0.3276<br>11 | 1.5  |    |     |            |                                                                     |              |      |
| R=COOH            |     |            |                                                                                         |              |      |    |     |            |                                                                     |              |      |
| 25                | 375 | 0.279<br>1 | H-4(A)->LUMO(A) (15%), H-2(B)->L+1(B) (22%)                                             | 0.3686<br>46 | 3.65 | 31 | 362 | 0.440<br>6 | H-4(A)->LUMO(A) (14%), H-5(B)->L+1(B) (20%), H-4(B)->L+1(B) (16%)   | 0.41<br>245  | 3.04 |
| 4                 | 684 | 0.241<br>3 | H-3(B)->LUMO(B) (87%)                                                                   | 0.4847<br>19 | 0.36 | 36 | 345 | 0.164<br>5 | H-7(A)->LUMO(A) (34%), H-6(A)->LUMO(A) (11%)                        | 0.38<br>6072 | 2.36 |
| 27                | 372 | 0.199<br>9 | H-3(B)->L+1(B) (18%), H-2(B)->L+1(B) (31%)                                              | 0.3352<br>46 | 3.17 | 11 | 559 | 0.162<br>4 | H-3(B)->LUMO(B) (62%), H-1(B)->LUMO(B) (10%)                        | 0.42<br>965  | 1.43 |
| 36                | 348 | 0.138      | H-7(A)->LUMO(A) (10%), H-6(A)-                                                          | 0.2824       | 2.46 |    |     |            | R=NO <sub>2</sub>                                                   |              |      |

|                   |     |            |                                                                   |              |      |    |     |            |                                              |              |      |
|-------------------|-----|------------|-------------------------------------------------------------------|--------------|------|----|-----|------------|----------------------------------------------|--------------|------|
|                   |     | 3          | >LUMO(A) (51%)                                                    | 01           |      |    |     |            |                                              |              |      |
| 24                | 378 | 0.116<br>2 | HOMO(B)->L+2(B) (44%)                                             | 0.3346<br>01 | 2.34 | 38 | 358 | 0.203<br>6 | H-7(A)->LUMO(A) (26%), H-6(A)->LUMO(A) (22%) | 0.34<br>664  | 3.08 |
| R=NO <sub>2</sub> |     |            |                                                                   |              |      | 33 | 373 | 0.196<br>9 | H-5(B)->L+1(B) (40%), H-1(B)->L+1(B) (11%)   | 0.37<br>8314 | 3.62 |
| 27                | 387 | 0.346<br>2 | H-5(A)->LUMO(A) (21%), H-5(B)->L+1(B) (20%), H-2(B)->L+1(B) (12%) | 0.3872<br>37 | 4.5  | 35 | 369 | 0.187<br>3 | H-6(B)->L+1(B) (16%), H-4(B)->L+1(B) (32%)   | 0.33<br>4957 | 3.67 |
| 4                 | 718 | 0.267<br>9 | H-3(B)->LUMO(B) (90%)                                             | 0.5050<br>8  | 0.58 | 10 | 582 | 0.127      | H-3(B)->LUMO(B) (51%)                        | 0.41<br>8201 | 1.67 |

Table S6. Calculated redox potential and dipole moment of the ruthenium and iron-based complexes.

| Ligand substituents | Hammett constants | Redox potential V vs NHE | Dipole moment, debye | Redox potential V vs NHE | Dipole moment, debye |
|---------------------|-------------------|--------------------------|----------------------|--------------------------|----------------------|
|                     |                   | Ru                       |                      | Fe                       |                      |
| NH <sub>2</sub>     | -0.66             | 0.46                     | 14.2                 | 0.54                     | 11.30                |
| OH                  | -0.37             | 0.60                     | 11.2                 | 0.64                     | 9.47                 |
| CH <sub>3</sub>     | -0.17             | 0.64                     | 11.4                 | 0.67                     | 10.55                |
| H                   | 0                 | 0.67                     | 10.3                 | 0.79                     | 9.02                 |
| COOH                | 0.45              | 0.76                     | 9.4                  | 0.96                     | 9.22                 |
| NO <sub>2</sub>     | 0.78              | 0.86                     | 8.2                  | 0.86                     | 7.8                  |

Table S7 Representation of Natural transition orbitals (NTO) of the Hole and Electron (particle) pair for most intensive electron excitations of diphenylpyridile Schiff base ligand systems. NTO pairs that contribute more than 50% to each excited state (Isodensity contour 0.03).

| Excited state     | Hole                                                                                | Electron                                                                             | Hole-electron eigenvalue |
|-------------------|-------------------------------------------------------------------------------------|--------------------------------------------------------------------------------------|--------------------------|
| R=NH <sub>2</sub> |                                                                                     |                                                                                      |                          |
| 1                 | 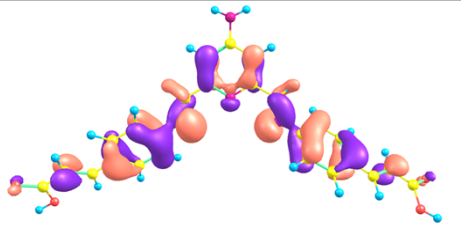 |  | 0.5848                   |
| R=OH              |                                                                                     |                                                                                      |                          |
| 1                 |  |  | 0.5880                   |
| R=CH <sub>3</sub> |                                                                                     |                                                                                      |                          |
| 1                 |  |  | 0.6278                   |
| R=H               |                                                                                     |                                                                                      |                          |
| 1                 |  |  | 0.6362                   |



| R=COOH            |                                                                                   |                                                                                    |        |
|-------------------|-----------------------------------------------------------------------------------|------------------------------------------------------------------------------------|--------|
| 1                 | 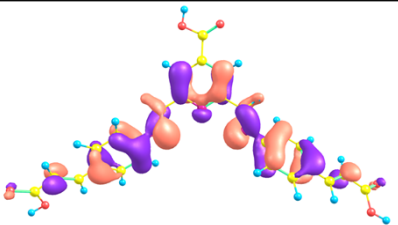 |  | 0.6885 |
| R=NO <sub>2</sub> |                                                                                   |                                                                                    |        |
| 1                 |  |  | 0.7359 |

Table S8 Representation of Natural transition orbitals (NTO) of the Hole and Electron (particle) pair for most intensive electron excitations of Ru(II) and Fe(II) complexes. NTO pairs that contribute more than 50% to each excited state (Isodensity contour 0.03).

| Excited state     | Hole                                                                                | Electron                                                                            | Hole-electron eigenvalue | Excited state    | Hole                                                                                  | Electron                                                                              | Hole-electron eigenvalue |
|-------------------|-------------------------------------------------------------------------------------|-------------------------------------------------------------------------------------|--------------------------|------------------|---------------------------------------------------------------------------------------|---------------------------------------------------------------------------------------|--------------------------|
| Ru(II)-complexes  |                                                                                     |                                                                                     |                          | Fe(II)-complexes |                                                                                       |                                                                                       |                          |
| R=NH <sub>2</sub> |                                                                                     |                                                                                     |                          |                  |                                                                                       |                                                                                       |                          |
| 10                | 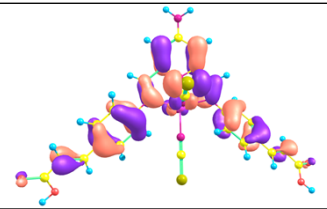   |    | 0.6941                   | 13               |    |    | 0.6271                   |
| R=OH              |                                                                                     |                                                                                     |                          |                  |                                                                                       |                                                                                       |                          |
| 9                 |    |    | 0.6784                   | 13               |    |    | 0.6372                   |
| R=CH <sub>3</sub> |                                                                                     |                                                                                     |                          |                  |                                                                                       |                                                                                       |                          |
| 9                 |   |   | 0.7562                   | 13               |   |   | 0.6949                   |
| R=H               |                                                                                     |                                                                                     |                          |                  |                                                                                       |                                                                                       |                          |
| 9                 |  |  | 0.7635                   | 13               |  |  | 0.7045                   |

|                   |                                                                                    |                                                                                    |        |    |                                                                                      |                                                                                      |        |
|-------------------|------------------------------------------------------------------------------------|------------------------------------------------------------------------------------|--------|----|--------------------------------------------------------------------------------------|--------------------------------------------------------------------------------------|--------|
|                   |                                                                                    |                                                                                    |        | 17 | 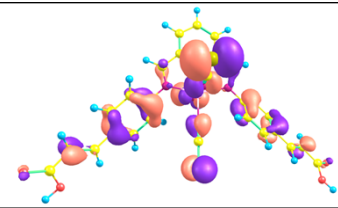  |   | 0.6589 |
| R=COOH            |                                                                                    |                                                                                    |        |    |                                                                                      |                                                                                      |        |
| 9                 |   |   | 0.5492 | 13 |   |   | 0.3456 |
|                   |                                                                                    |                                                                                    |        | 17 |   |   | 0.7039 |
| R=NO <sub>2</sub> |                                                                                    |                                                                                    |        |    |                                                                                      |                                                                                      |        |
| 8                 |  |  | 0.8203 | 17 |  |  | 0.7273 |

Table S9. Representation of Natural transition orbitals (NTO) of the Hole and Electron (particle) pair for most intensive electron excitations of Ru(III) and Fe(III) complexes. NTO pairs that contribute more than 20% to each excited state (Isodensity contour 0.03).

| Excited state | Hole | Electron | Hole-electron | Excited state | Hole | Electron | Hole-electron |
|---------------|------|----------|---------------|---------------|------|----------|---------------|
|---------------|------|----------|---------------|---------------|------|----------|---------------|

|                   | Ru(III)-complexes                                                                  |                                                                                    | eigenvalue |    | Fe(III)-complexes                                                                    |                                                                                      | eigenvalue |
|-------------------|------------------------------------------------------------------------------------|------------------------------------------------------------------------------------|------------|----|--------------------------------------------------------------------------------------|--------------------------------------------------------------------------------------|------------|
| R=NH <sub>2</sub> |                                                                                    |                                                                                    |            |    |                                                                                      |                                                                                      |            |
| 29                | 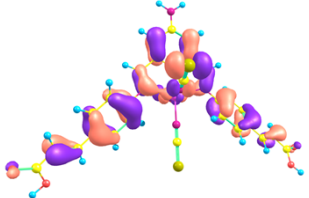  |   | A 0.3518   | 28 |   |   | A 0.6610   |
|                   |   |   | B 0.9403   |    |   |   | B 0.7404   |
| R=OH              |                                                                                    |                                                                                    |            |    |                                                                                      |                                                                                      |            |
| 28                |   |   | A 0.3482   | 27 |   |   | A 0.8623   |
|                   |  |  | B 1.0905   |    |  |  | B 0.7945   |
| R=CH <sub>3</sub> |                                                                                    |                                                                                    |            |    |                                                                                      |                                                                                      |            |

|        |                                                                                     |                                                                                     |          |    |                                                                                       |                                                                                      |          |
|--------|-------------------------------------------------------------------------------------|-------------------------------------------------------------------------------------|----------|----|---------------------------------------------------------------------------------------|--------------------------------------------------------------------------------------|----------|
| 27     | 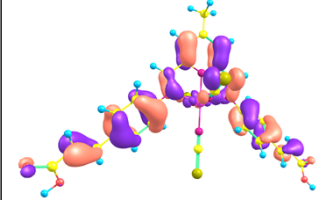   |    | A 0.4966 | 27 |    |   | A 0.6837 |
|        |    |    | B 0.6823 |    |    |   | B 1.0112 |
| R=H    |                                                                                     |                                                                                     |          |    |                                                                                       |                                                                                      |          |
| 27     |    |    | A 0.4978 | 27 |    |   | A 0.4798 |
|        |   |   | B 0.7424 |    |   |  | B 1.1891 |
| R=COOH |                                                                                     |                                                                                     |          |    |                                                                                       |                                                                                      |          |
| 25     |  |  | A 0.4066 | 31 |  |                                                                                      | A 0.4813 |

|          |  |  |           |    |  |  |          |
|----------|--|--|-----------|----|--|--|----------|
|          |  |  | B 0.8765  |    |  |  | B 1.044  |
| 27       |  |  | B 1.3930  |    |  |  |          |
| $R=NO_2$ |  |  |           |    |  |  |          |
| 27       |  |  | A 0.53854 | 38 |  |  | A 1.3328 |
|          |  |  | B 0.9349  |    |  |  | B 0.2477 |
